# Supplementary material for: Germline Mutations in MAP3K6 Are Associated with Familial Gastric Cancer
Source: PubMed Central journal article supplement (PMC4207611; doi:10.1371/journal.pgen.1004669), 2014-10-23

# Supplementary figure 1.

## CpG island 2

Proband's PBLs DNA ○○○○○○  
Proband's tumour DNA ●●●●●●

Control normal stomach DNA\* ○○○○○○  
Summary of 7 GC cell lines # ●●●●●●

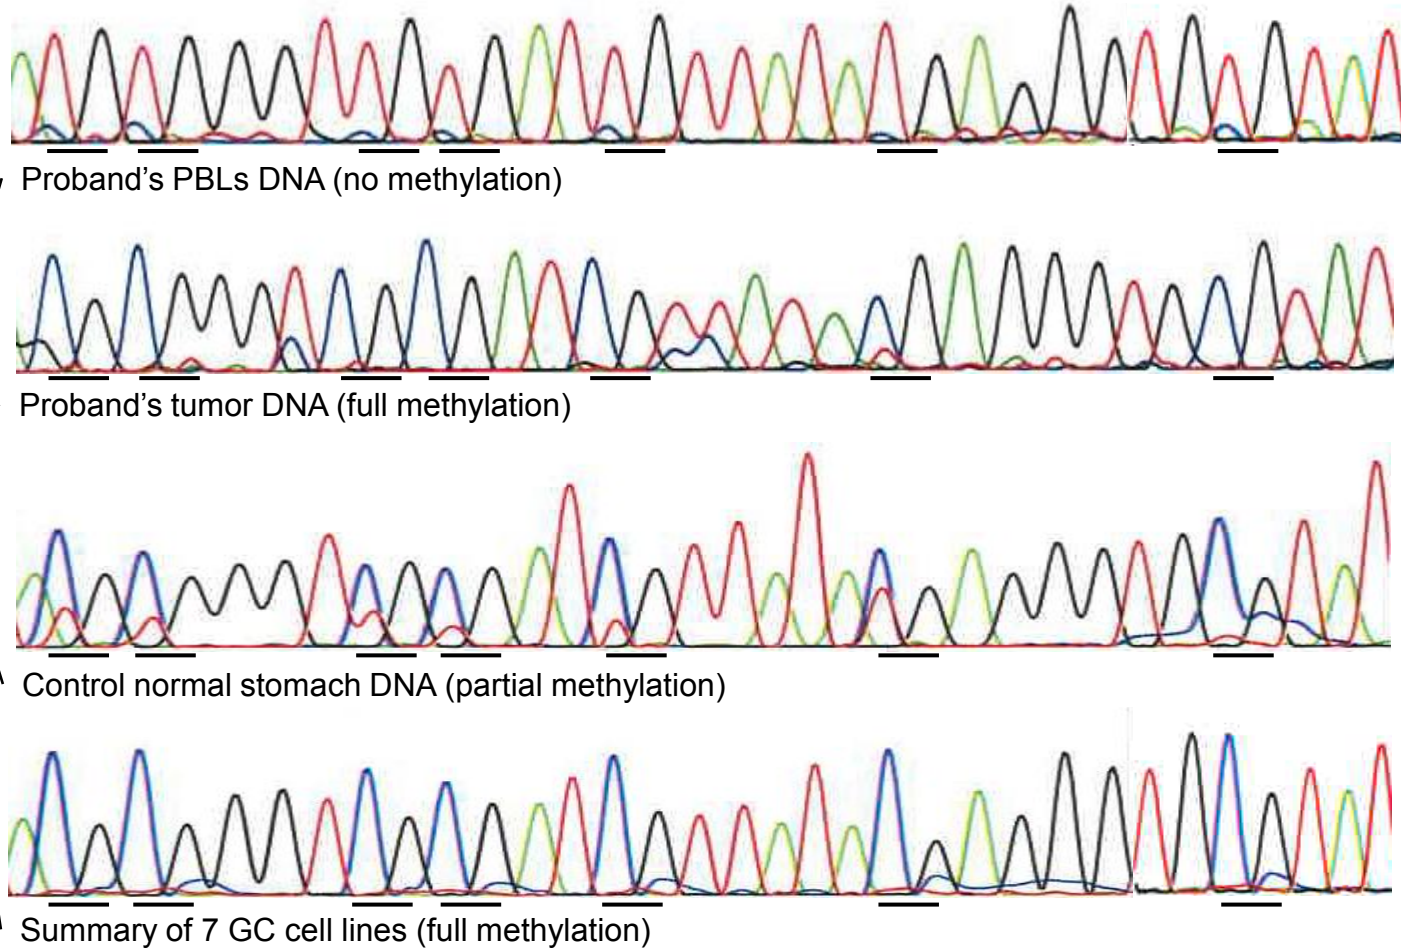

Supplement: pgen.1004669.s001.pdf [file pgen.1004669.s001.pdf]
