# Supplementary material for: Germline Mutations in MAP3K6 Are Associated with Familial Gastric Cancer
Source: PubMed Central journal article supplement (PMC4207611; doi:10.1371/journal.pgen.1004669), 2014-10-23
Supplement: pgen.1004669.s002.pdf [file pgen.1004669.s002.pdf]

## Supplementary figure 2.

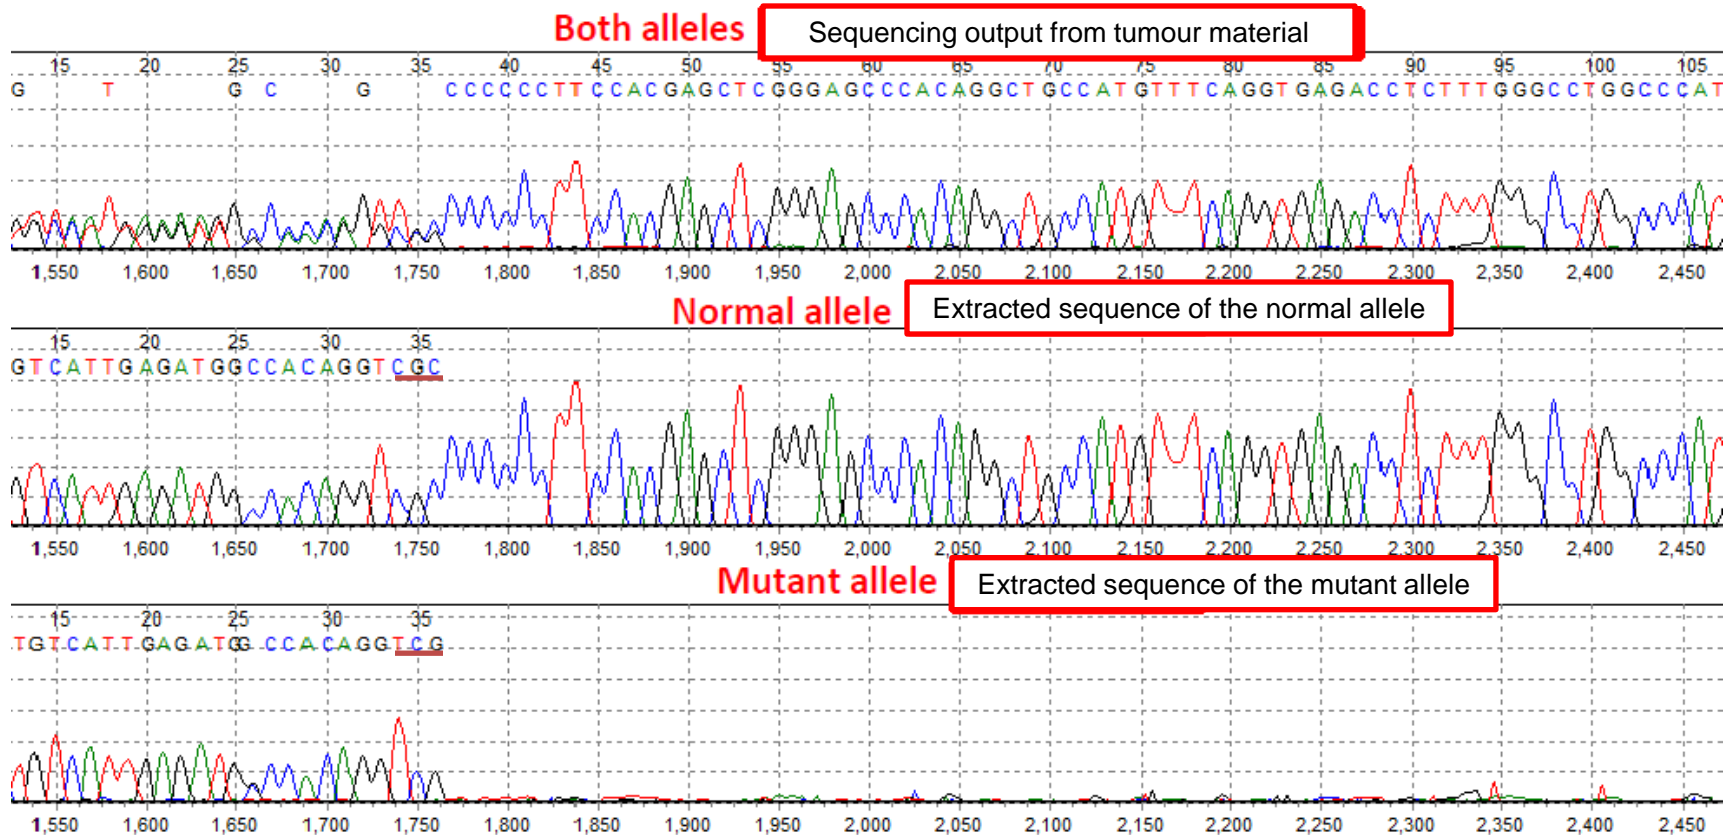

**Supplementary figure 2.** Partial electropherogram showing the truncating mutation (2544delC) and the wild-type sequence at similar detection levels in the tumour from the Portuguese proband. This results allows exclusion of LOH as a second-hit, due to maintained heterozygosity at the mutation site.
